# Supplementary material
Source: bioRxiv or medRxiv preprint supplement (https://medrxiv.org/highwire/filestream/90019/field_highwire_adjunct_files/0/2020.07.17.20156042-1.pdf)
Supplement: Supplementary file [file 2020.07.17.20156042-1.pdf]

## **Online supplementary file**

### **Changes in the adult consequences of adolescent mental health: findings from the 1958 and 1970 British birth cohorts**

Ellen Jo Thompson, PhD<sup>1</sup>, Marcus Richards, PhD<sup>2</sup> George B. Ploubidis, PhD<sup>1</sup> Peter Fonagy, PhD<sup>3</sup> and Praveetha Patalay, PhD<sup>1,2</sup>

## Contents

eTable 1. Measurement invariance in the Rutter questionnaire at age 16 years between the cohorts

eTable 2. Multi-group item-factor loadings (two factor model) in each cohort

eTable 3. Multi-group item-factor loadings (bi-factor model) in each cohort

eTable 4. Count and percentage of complete case and missing exposures and outcomes.

eTable 5. Correlations between each outcome at age 16 and exposures at age 42 years

eFigure 1. Predicted probabilities (from the two-factor model) for externalising (1) and internalising symptoms (2) at age 16 (x-axis) association with each outcome at age 42 in the two cohorts

eFigure 2. Predicted probabilities (from the bi-factor model) for externalising (3) and internalising symptoms (4) at age 16 (x-axis) association with each outcome at age 42 in the two cohorts.

eFigure 3. Predicted probabilities (from the bi-factor model) in males and females for general psychopathology at age 16 (x-axis) association with high psychological distress

eFigure 4. Predicted probabilities (from the two-factor model) in males and females for externalising symptoms and internalising symptoms at age 16 (x-axis) association with professional employment.

eTable 1. Measurement invariance analysis for the Rutter scales at age 16 across cohorts

|       | Configural<br>invariance<br>model | Metric<br>invariance<br>model | Scalar<br>invariance<br>model |
|-------|-----------------------------------|-------------------------------|-------------------------------|
| RMSEA | .069                              | .067                          | .065                          |
| SRMR  | .083                              | .084                          | .084                          |
| CFI   | .865                              | .862                          | .864                          |

*Note.* For the RMSEA and SRMR, a score closest to zero indicates good model fit, whereas for CFI it is closest to one. Rules of thumb for model comparison applied are from Chen (2007) as follows: for RMSEA invariance is met if a change between models is smaller than 0.015, for SRMR if it is smaller than 0.03 and for CFI if it is smaller than 0.01<sup>1</sup>

<sup>1</sup> Chen FF. Sensitivity of goodness of fit indexes to lack of measurement invariance. *Struct Equ Model.* 2007;14(3):464-504. doi:10.1080/10705510701301834

eTable 2. Standardised factor loadings (two factor model) for 1958 NCDS and 1970 BCS cohort (multigroup model)

| Items                                   | 1958 NCDS               |               | 1970 BCS                |               |
|-----------------------------------------|-------------------------|---------------|-------------------------|---------------|
|                                         | Factor Loadings<br>(SE) |               | Factor Loadings<br>(SE) |               |
|                                         | EXT                     | INT           | EXT                     | INT           |
| restless, difficulty staying seated     | 0.73<br>(.01)           | -             | 0.63<br>(.01)           | -             |
| squirmy, fidgety child                  | 0.78<br>(.01)           | -             | 0.65<br>(.01)           | -             |
| often destroys others property          | 0.71<br>(.02)           | -             | 0.73<br>(.02)           | -             |
| frequently fights, quarrelsome          | 0.68<br>(.01)           | -             | 0.74<br>(.01)           | -             |
| not much liked by other children        | 0.56<br>(.02)           | -             | 0.63<br>(.02)           | -             |
| irritable, flies off the handle         | 0.65<br>(.01)           | -             | 0.73<br>(.01)           | -             |
| twitches, mannerisms, tics-face or body | 0.41<br>(.02)           | -             | 0.45<br>(.03)           | -             |
| is often disobedient                    | 0.70<br>(.01)           | -             | 0.81<br>(.001)          | -             |
| cannot settle more than a few moments   | 0.69<br>(.01)           | -             | 0.71<br>(.01)           | -             |
| often tells lies                        | 0.69<br>(.01)           | -             | 0.76<br>(.01)           | -             |
| bullies other children                  | 0.65<br>(.01)           | -             | 0.76<br>(.01)           | -             |
| often worries about things              | -                       | 0.62<br>(.01) | -                       | 0.69<br>(.01) |
| does things on own, rather solitary     | -                       | 0.32<br>(.01) | -                       | 0.50<br>(.01) |
| appears miserable, unhappy & tearful    | -                       | 0.86<br>(.01) | -                       | 0.86<br>(.01) |
| fearful of new situations or things     | -                       | 0.54<br>(.01) | -                       | 0.59<br>(.01) |
| fussy, over particular                  | -                       | 0.35<br>(.01) | -                       | 0.47<br>(.01) |

*Note.* Model fit was assessed using the comparative fit index (CFI), Tucker Lewis index (TLI) and root mean square error of approximation (RMSEA). CFI and TLI closer to 1 indicate good fit to the data and RMSEA closer to 0 indicates good fit. Owing to the non-nested nature of the models, models could not be compared directly using a difference in fit statistic (e.g. Akaike information criterion) as they cannot be estimated when WLSMV estimation is used. Hence, model fit criteria and factor loadings were used to assess the quality of models. Externalising factor (EXT); Internalising factor (INT). Model fit indices for the two-factor CFA: 1958 NCDS ( $n = 11654$ ): RMSEA = 0.07; CFI = 0.86; TLI = 0.84; 1970 BCS ( $n = 8904$ ): RMSEA = 0.06; CFI = 0.91; TLI = 0.89

eTable 3. Standardised factor loadings (two factor model) for 1958 NCDS and 1970 BCS cohort (multigroup model)

| Items                                   | 1958 NCDS (1958)        |               |               | 1970 BCS (1970)         |               |                |
|-----------------------------------------|-------------------------|---------------|---------------|-------------------------|---------------|----------------|
|                                         | Factor Loadings<br>(SE) |               |               | Factor Loadings<br>(SE) |               |                |
|                                         | EXT                     | INT           | GEN           | EXT                     | INT           | GEN            |
| restless, difficulty staying seated     | 0.67<br>(.02)           | -             | 0.61<br>(.02) | 0.71<br>(.02)           | -             | 0.53<br>(.02)  |
| squirmy, fidgety child                  | 0.62<br>(.02)           | -             | 0.63<br>(.02) | 0.64<br>(.02)           | -             | 0.60<br>(.02)  |
| often destroys others property          | 0.04<br>(.03)           | -             | 0.73<br>(.02) | 0.03<br>(.02)           | -             | 0.74<br>(.01)  |
| frequently fights, quarrelsome          | 0.28<br>(.03)           | -             | 0.71<br>(.01) | 0.23<br>(.02)           | -             | 0.67<br>(.011) |
| not much liked by other children        | 0.08<br>(.03)           | -             | 0.57<br>(.02) | 0.09<br>(.02)           | -             | 0.60<br>(.01)  |
| irritable, flies off the handle         | 0.09<br>(.02)           | -             | 0.69<br>(.01) | 0.05<br>(.02)           | -             | 0.67<br>(.01)  |
| twitches, mannerisms, tics-face or body | 0.18<br>(.03)           | -             | 0.39<br>(.02) | 0.22<br>(.03)           | -             | 0.40<br>(.02)  |
| is often disobedient                    | 0.17<br>(.03)           | -             | 0.73<br>(.01) | 0.15<br>(.02)           | -             | 0.75<br>(.01)  |
| cannot settle more than a few moments   | 0.33<br>(.03)           | -             | 0.65<br>(.02) | 0.33<br>(.02)           | -             | 0.67<br>(.01)  |
| often tells lies                        | 0.16<br>(.03)           | -             | 0.71<br>(.01) | 0.14<br>(.02)           | -             | 0.71<br>(.01)  |
| bullies other children                  | 0.32<br>(.03)           | -             | 0.67<br>(.02) | 0.30<br>(.02)           | -             | 0.68<br>(.01)  |
| often worries about things              | -                       | 0.71<br>(.02) | 0.30<br>(.01) | -                       | 0.74<br>(.02) | 0.32<br>(.01)  |
| does things on own, rather solitary     | -                       | 0.32<br>(.01) | 0.16<br>(.01) | -                       | 0.27<br>(.01) | 0.27<br>(.01)  |
| appears miserable, unhappy & tearful    | -                       | 0.39<br>(.02) | 0.57<br>(.02) | -                       | 0.34<br>(.01) | 0.58<br>(.01)  |
| fearful of new situations or things     | -                       | 0.60<br>(.02) | 0.23<br>(.01) | -                       | 0.56<br>(.02) | 0.30<br>(.01)  |
| fussy, over particular                  | -                       | 0.32<br>(.01) | 0.19<br>(.01) | -                       | 0.27<br>(.01) | 0.23<br>(.01)  |

*Note.* The model fit indices for the bi-factor CFA: 1958 NCDS ( $n = 11654$ ): RMSEA = 0.04; CFI = 0.96; TLI = 0.94 (just under the accepted threshold for very good model fit (0.95)); 1970 BCS ( $n = 8904$ ): RMSEA = 0.04 CFI = 0.94; TLI = 0.94

eTable 4. Count and percentage of available data for the exposures and outcomes in each cohort

|                    |                                   |                                           | <b>Cohort</b>    |      |              |               |                              |                   |      |             |               |                              |
|--------------------|-----------------------------------|-------------------------------------------|------------------|------|--------------|---------------|------------------------------|-------------------|------|-------------|---------------|------------------------------|
|                    |                                   |                                           | <b>1958 NCDS</b> |      |              |               |                              | <b>1970 BCS70</b> |      |             |               |                              |
| Domain             | Measure                           |                                           | Age              | year | N valid (%)  | N missing (%) | N of total valid sample* (%) | age               | year | N valid (%) | N missing (%) | N of total valid sample* (%) |
| Exposure at age 16 | Adolescent internalising symptoms | Rutter Behavioural Scale                  | 16               | 1974 | 11080 (61.4) | 5011 (38.6)   | 16091 (100)                  | 16                | 1986 | 7882 (51.6) | 7376 (48.4)   | 15258 (100)                  |
|                    | Adolescent ixternalising symptoms | Rutter Behavioural Scale                  | 16               | 1974 | 11080 (61.4) | 5011 (38.6)   | 16091 (100)                  | 16                | 1986 | 7885 (51.7) | 7373 (48.3)   | 15258 (100)                  |
| Outcomes at age 42 | Health and well-being             | Malaise Inventory                         | 42               | 2000 | 11277 (60.8) | 4814 (39.2)   | 16091 (100)                  | 42                | 2012 | 7979 (52.3) | 7279 (47.7)   | 15258 (100)                  |
|                    |                                   | General Health                            | 42               | 2000 | 11374 (70.7) | 4717 (29.3)   | 16091 (100)                  | 42                | 2012 | 9069 (56.6) | 7527 (43.4)   | 15258 (100)                  |
|                    |                                   | Life Satisfaction                         | 42               | 2000 | 11268 (70)   | 4823 (30)     | 16091 (100)                  | 42                | 2012 | 8973 (58.8) | 6285 (41.2)   | 15258 (100)                  |
|                    | Socio-economic                    | Whether CM lives with a spouse or partner | 42               | 2000 | 11380 (70.7) | 4711 (29.3)   | 16091 (100)                  | 42                | 2012 | 9106 (59.7) | 6152 (40.3)   | 15258 (100)                  |
|                    |                                   | Voting behaviour                          | 42               | 2000 | 11350 (70.5) | 4741 (29.5)   | 16091 (100)                  | 42                | 2012 | 7890 (51.7) | 7368 (48.3)   | 15258 (100)                  |
|                    |                                   | Highest NVQ level up to 2000/2012         | 42               | 2000 | 11397 (70.8) | 4694 (29.2)   | 16091 (100)                  | 42                | 2012 | 9106 (59.7) | 6152 (40.3)   | 15258 (100)                  |
|                    |                                   | Employment Status                         | 42               | 2000 | 8285 (51.49) | 7806 (48.51)  | 16091 (100)                  | 42                | 2012 | 7854 (51.5) | 7404 (48.5)   | 15258 (100)                  |

eTable 5. Correlations between adolescent mental health and age 42 health and social outcomes.

| Cohort | Age 16 mental health exposure variables |                         | Age 42 health and social outcomes correlations |                                 |                |                   |               |                                    |                   |                 |
|--------|-----------------------------------------|-------------------------|------------------------------------------------|---------------------------------|----------------|-------------------|---------------|------------------------------------|-------------------|-----------------|
|        |                                         |                         | Mental Health                                  | Mental Health (binary variable) | General Health | Life Satisfaction | Co-habitation | Voted in the last general election | Obtained a degree | Employment type |
| 1958   | Mental Health (2-factor model)          | Externalising Symptoms  | .15                                            | .13                             | .14            | -0.10             | -.07          | -.08                               | -.14              | -.12            |
|        |                                         | Internalising Symptoms  | .19                                            | .14                             | .12            | -0.11             | -.07          | -.04                               | -.06              | -.06            |
|        | Mental Health (Bi-factor model)         | Externalising Symptoms  | -.03                                           | .02                             | .01            | .01               | -.01          | .005                               | -.01              | -.01            |
|        |                                         | Internalising Symptoms  | .15                                            | .09                             | .02            | -.05              | -.03          | .01                                | .02               | .02             |
|        |                                         | General psychopathology | .16                                            | .12                             | .14            | -.11              | -.07          | -.08                               | -.13              | -.11            |
| 1970   | Mental Health (2-factor model)          | Externalising Symptoms  | .17                                            | .14                             | .18            | -.13              | -.11          | -.11                               | -.16              | -.13            |
|        |                                         | Internalising Symptoms  | .22                                            | .17                             | .16            | -.13              | -.10          | -.06                               | -.09              | -.07            |
|        | Mental Health (Bi-factor model)         | Externalising Symptoms  | -.02                                           | -.01                            | -.03           | .01               | .01           | -.04                               | .01               | .04             |
|        |                                         | Internalising Symptoms  | .16                                            | .10                             | .05            | -.04              | -.02          | .05                                | .04               | .02             |
|        |                                         | General psychopathology | .18                                            | .15                             | .19            | -.14              | -.11          | -.02                               | -.16              | -.13            |

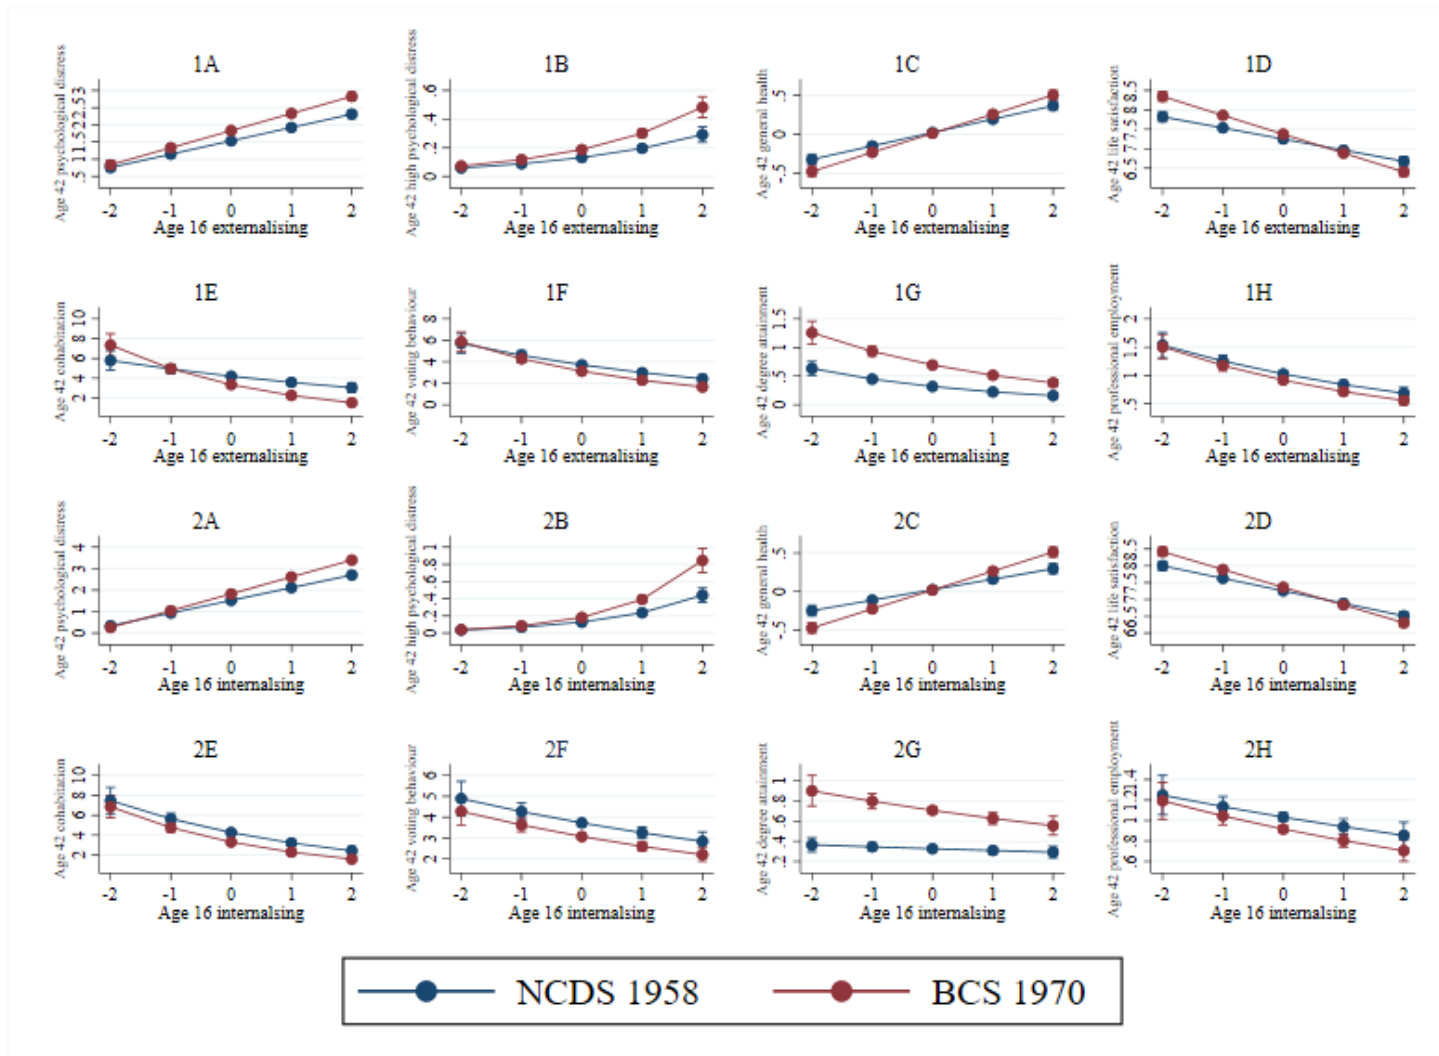

Figure 1. Predicted probabilities (from the two-factor model) for externalising (1) and internalising symptoms at age 16 (x-axis) association with each outcome at age 42 in the two cohorts.



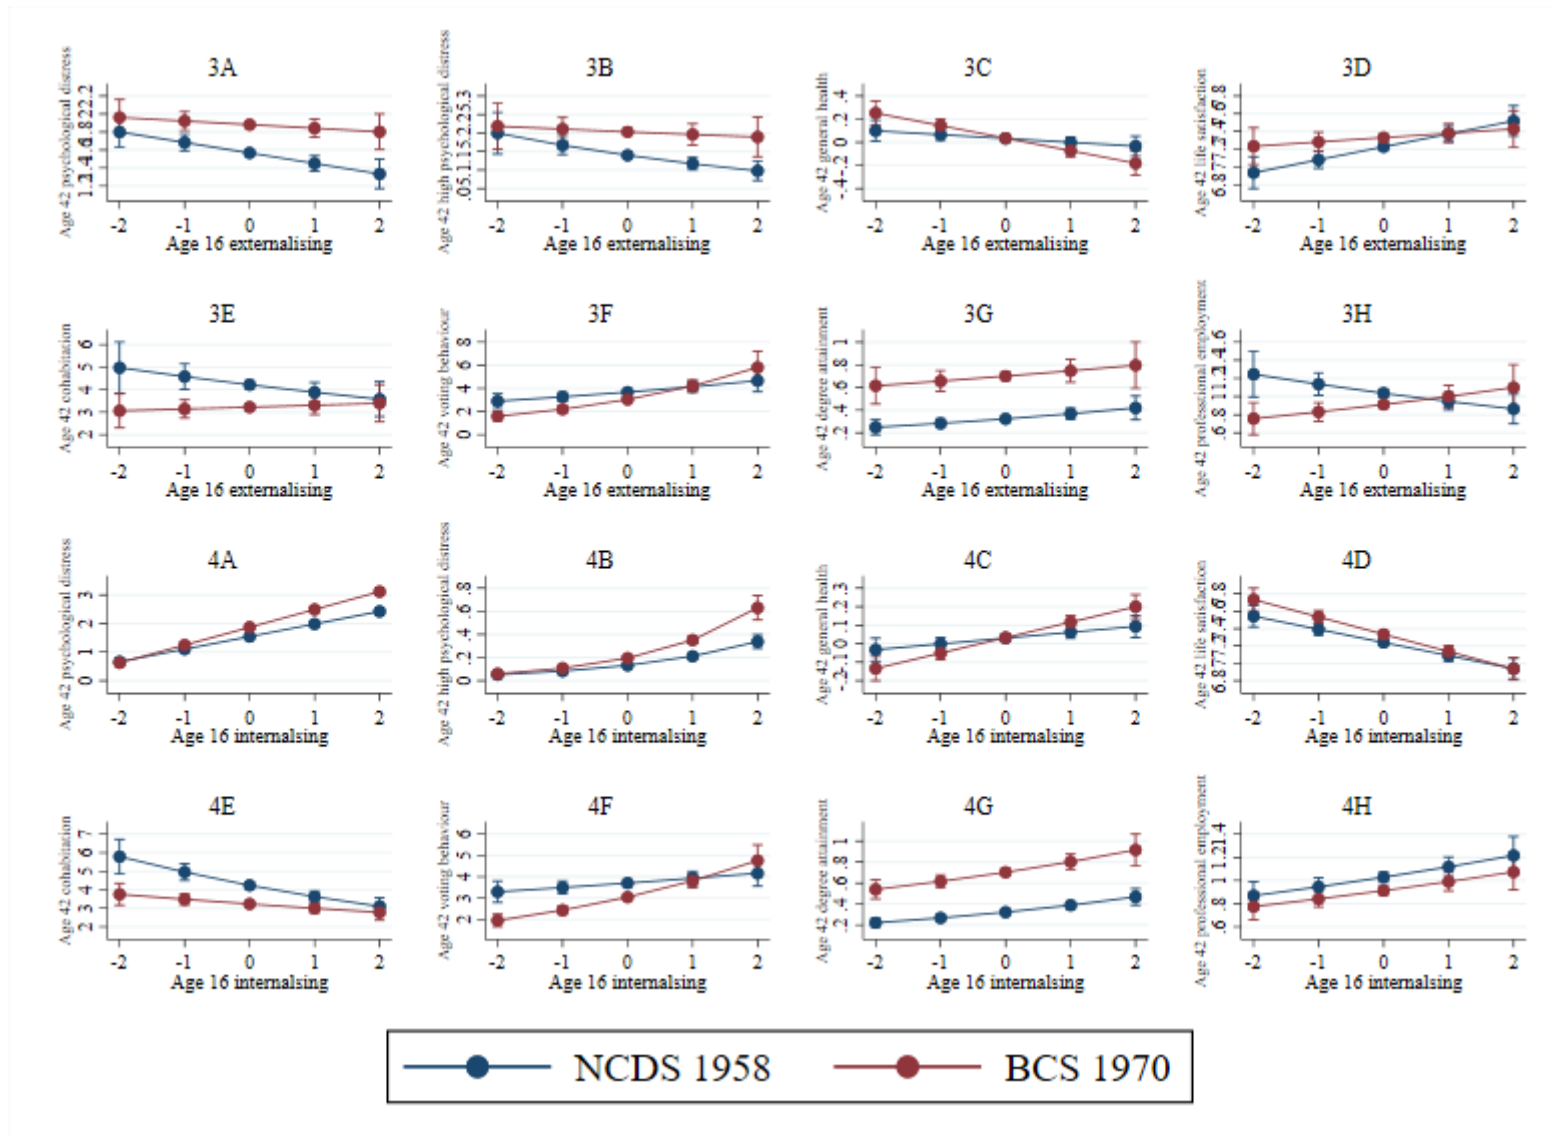

*eFigure 2.* Predicted probabilities (from the bi-factor model) for externalising (1) and internalising symptoms at age 16 (x-axis) association with each outcome at age 42 in the two cohorts.

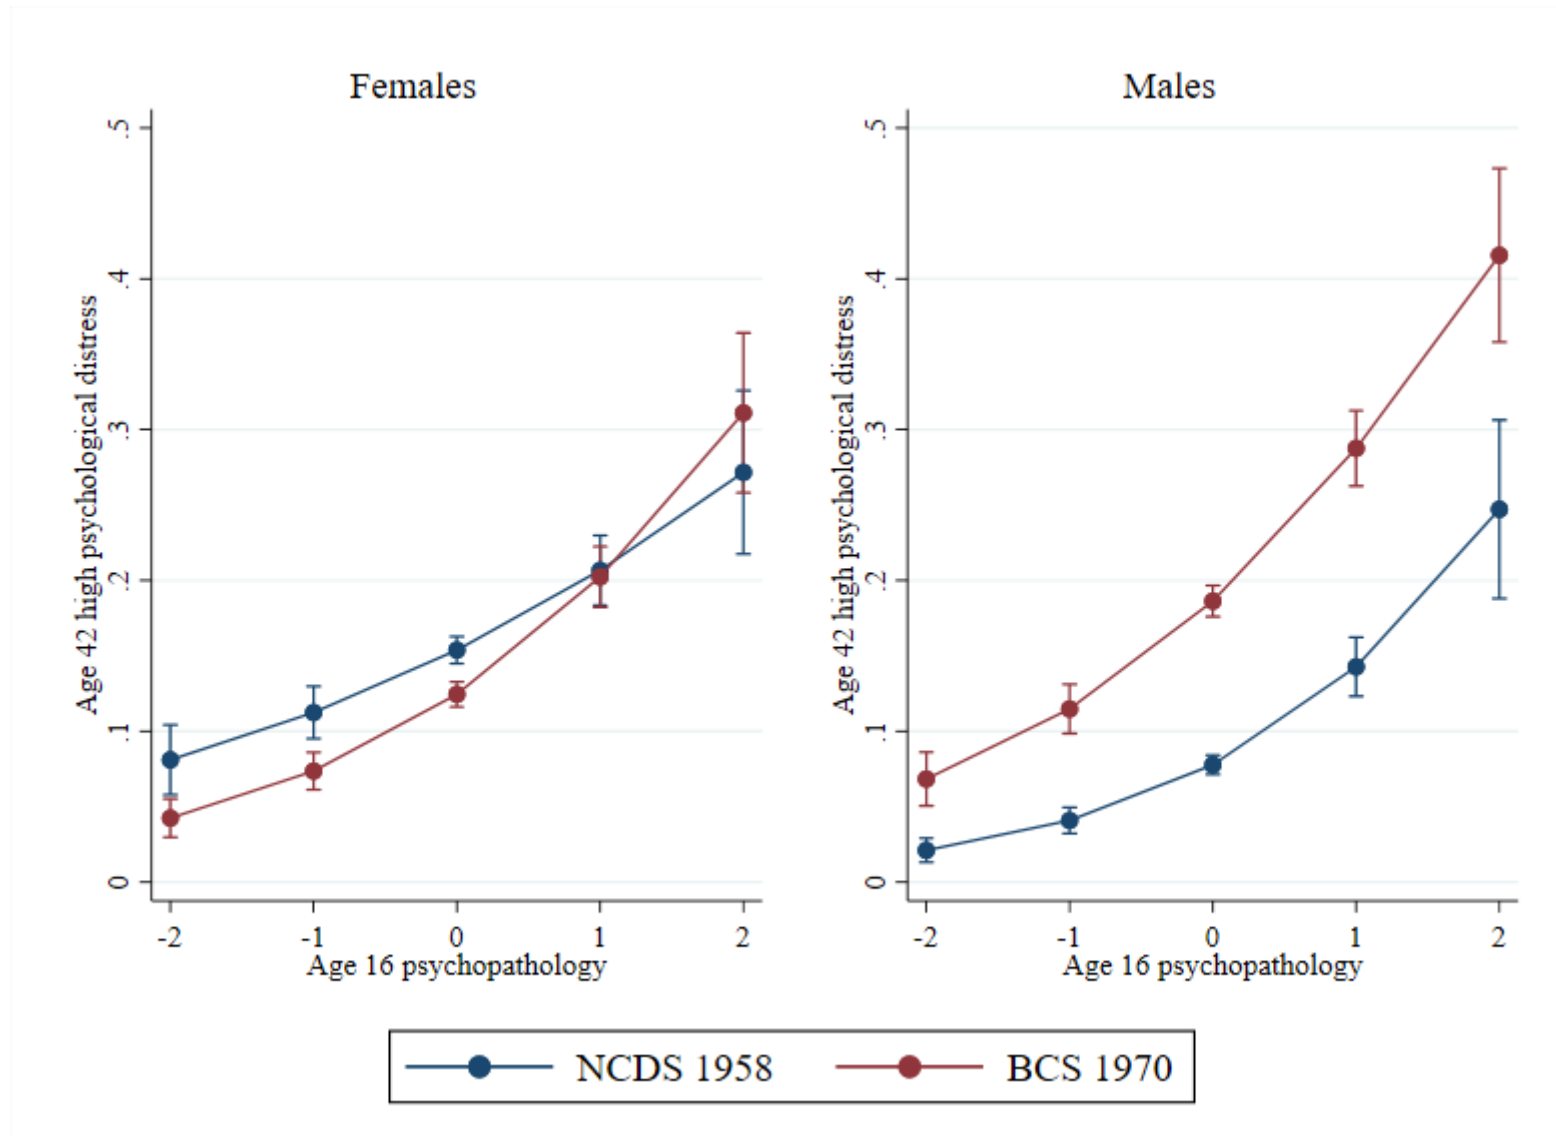

*eFigure 3.* Predicted probabilities (from the bi-factor model) in males and females for general psychopathology at age 16 (x-axis) association with high psychological distress

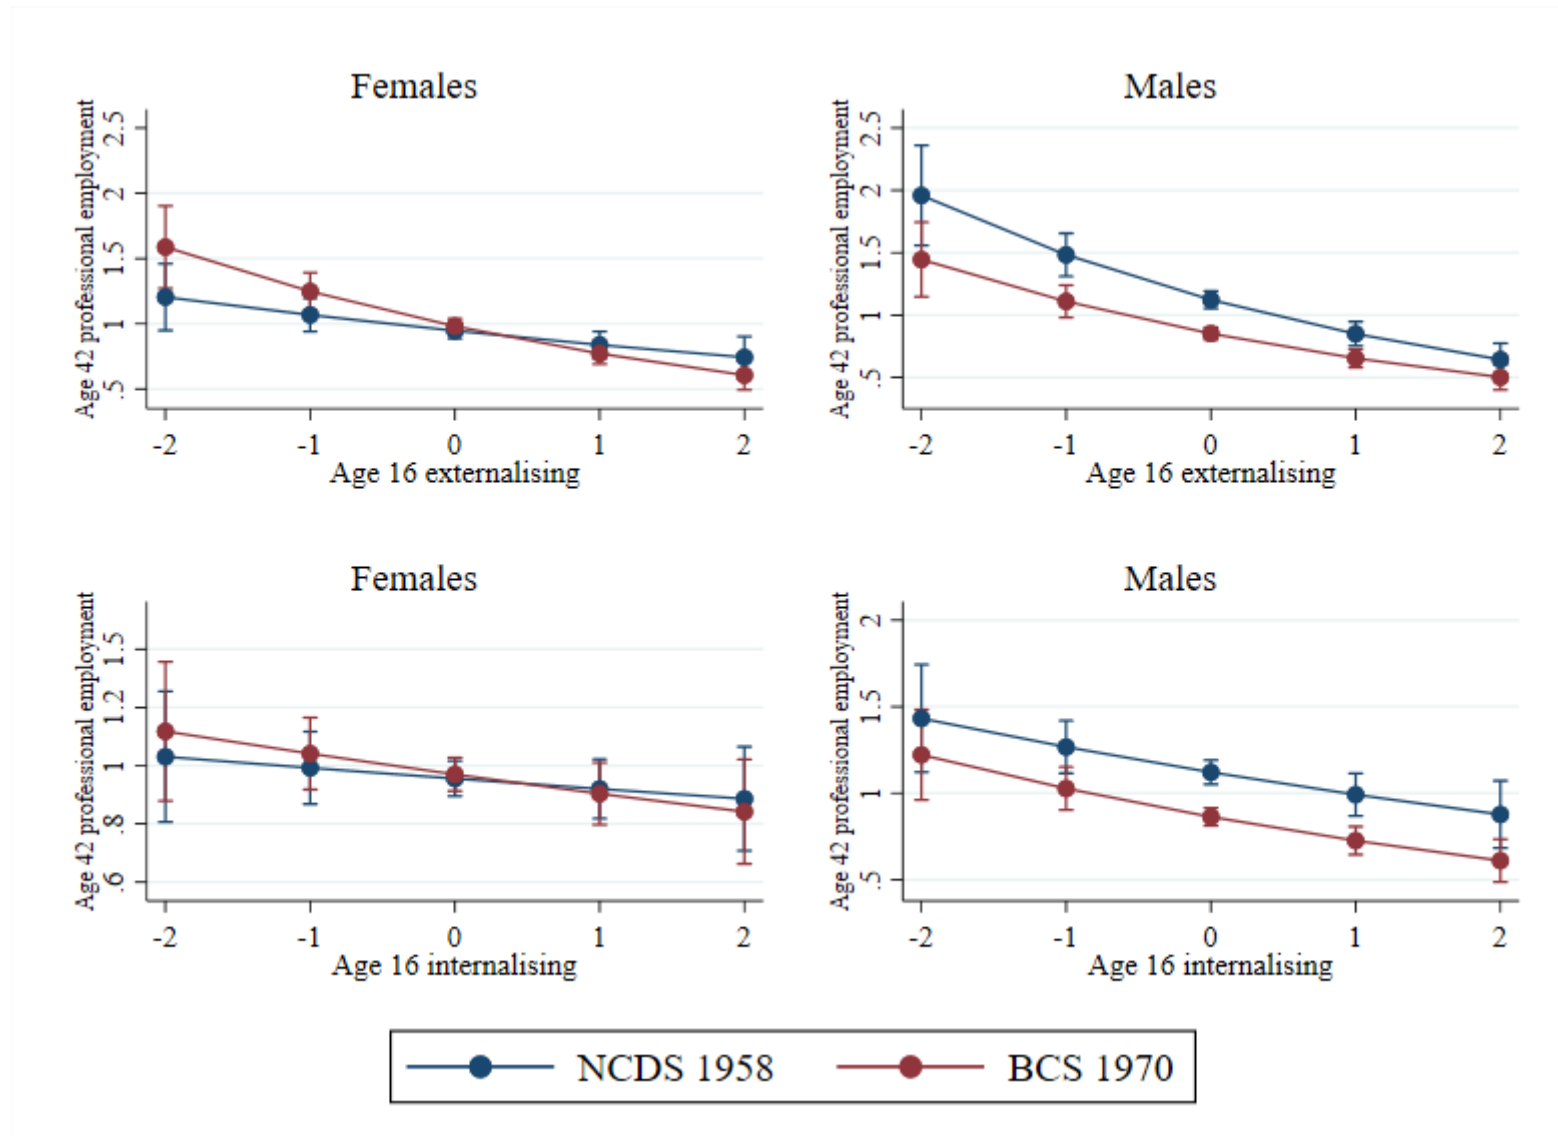

eFigure 4. Predicted probabilities (from the two-factor model) in males and females for externalising symptoms and internalising symptoms at age 16 (x-axis) association with professional employment.
